# Supplementary material for: Impact of high-concentration office-type bleaching agent on physical properties of different types of bulk-fill composites
Source: Research Square preprint supplement (doi:10.21203/rs.3.rs-6807989/v1), 2025-06-23

**IMAGES OF GELS AND RESTORATIVE MATERIALS**

**
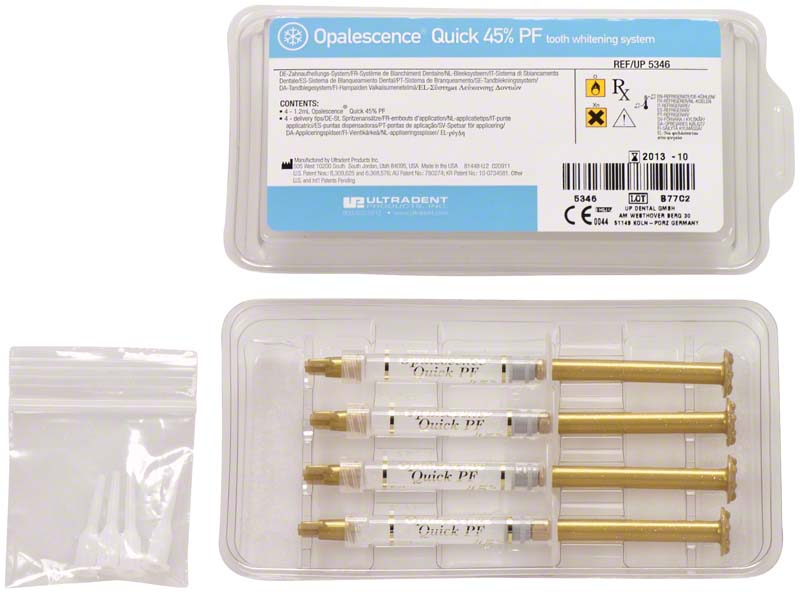
**
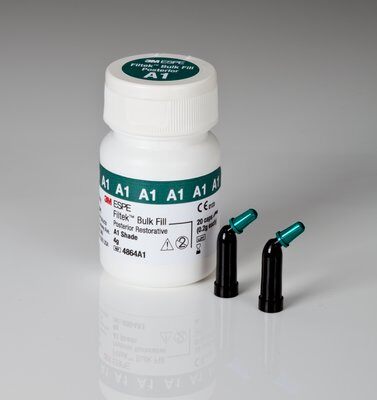

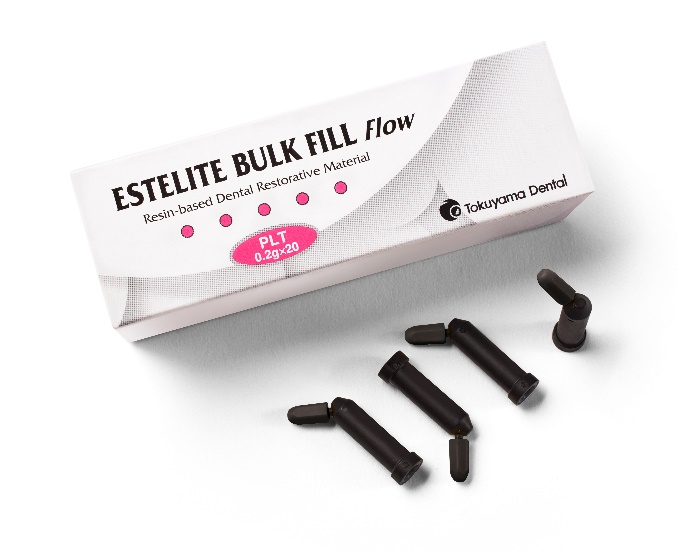


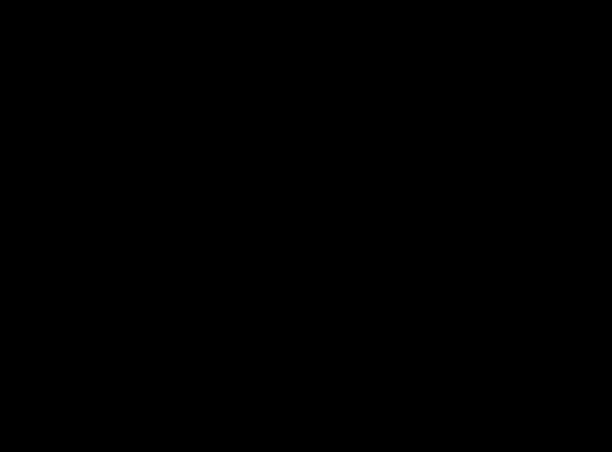

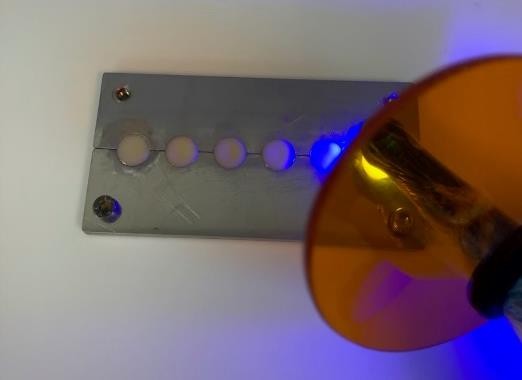

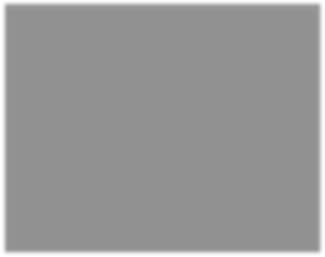

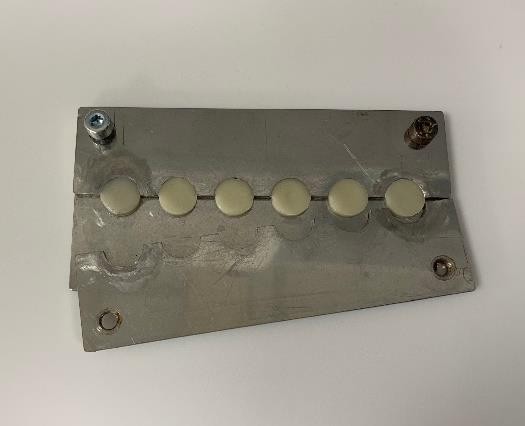


- Preparing of Samples in metal block

-
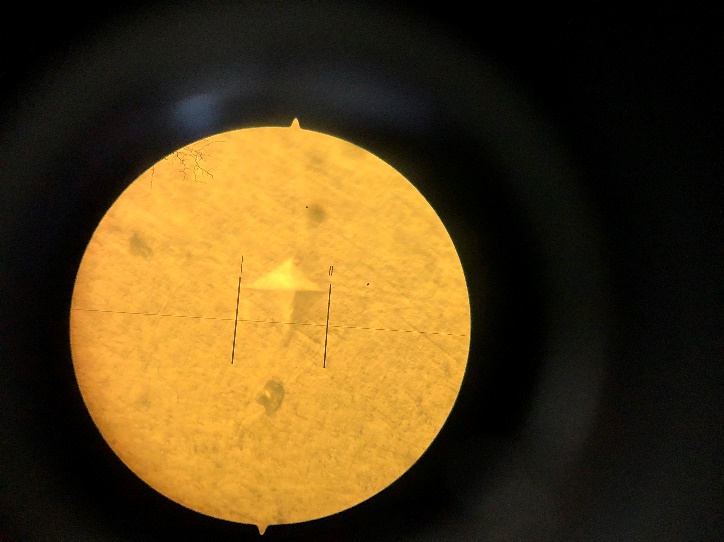

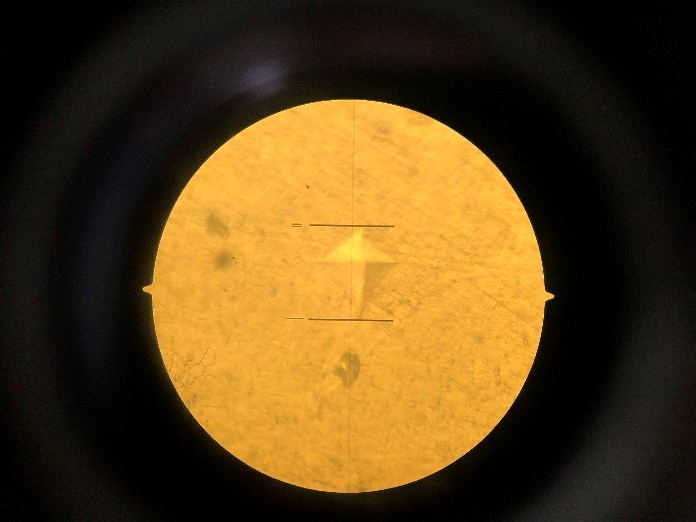
Surface view of 3M Filtek Bulk-fill Composite after 45% KP application
- Images of sample after microhardness measurement


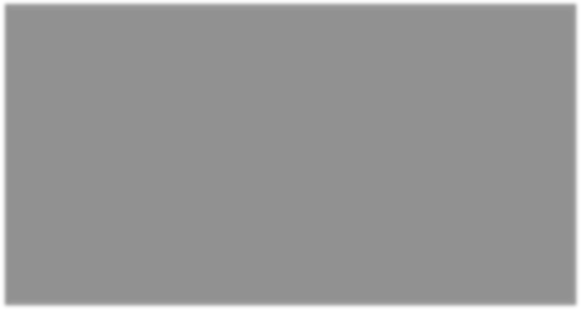

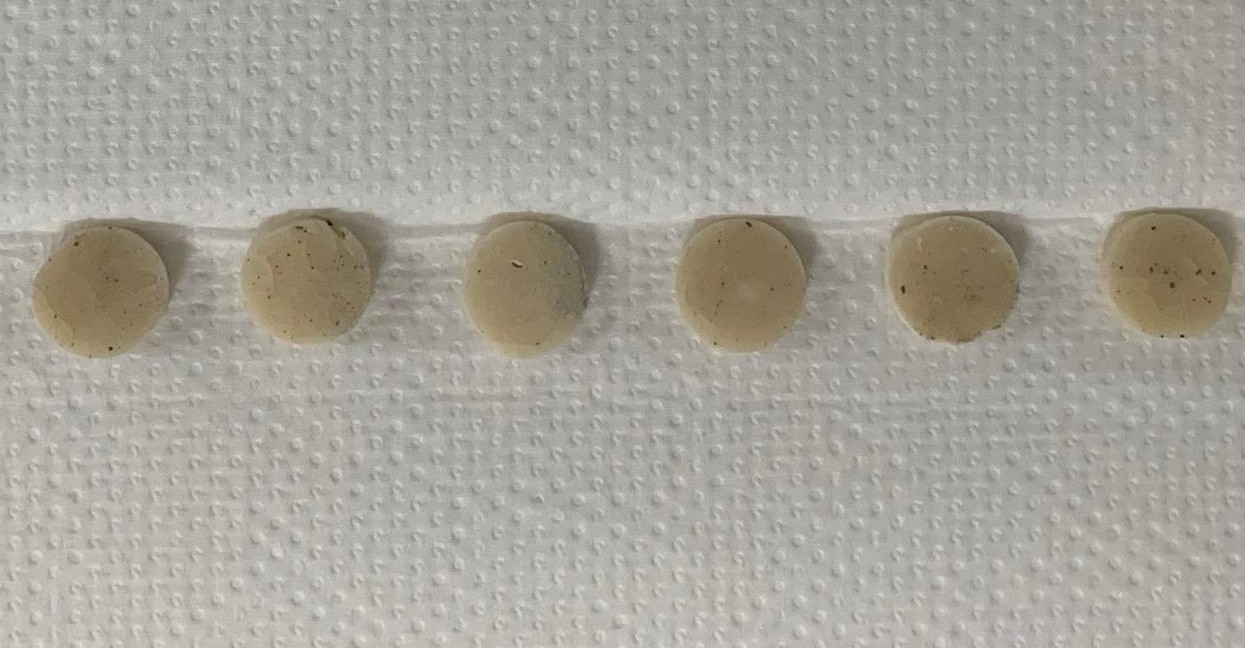

Supplement: Supplementary file 1 [file 58e3990dfb2b9a53dfc8af08.docx]
